# Supplementary material for: Mot en europeisk civilrätt
Source: Hindawi journal article supplement (doi:10.1155/2020/3816056), 1999-01-01
Supplement: f1 [file 3816056.f1.zip]

Archive with 4 entries (4 files):
- 3816056.f1.docx
- 3816056.f2.docx
- 3816056.f3a.pdf
- 3816056.f4b.pdf
