# Supplementary figures and images for: Mot en europeisk civilrätt
Source: Hindawi journal article supplement (doi:10.1155/2020/3816056), 1999-01-01

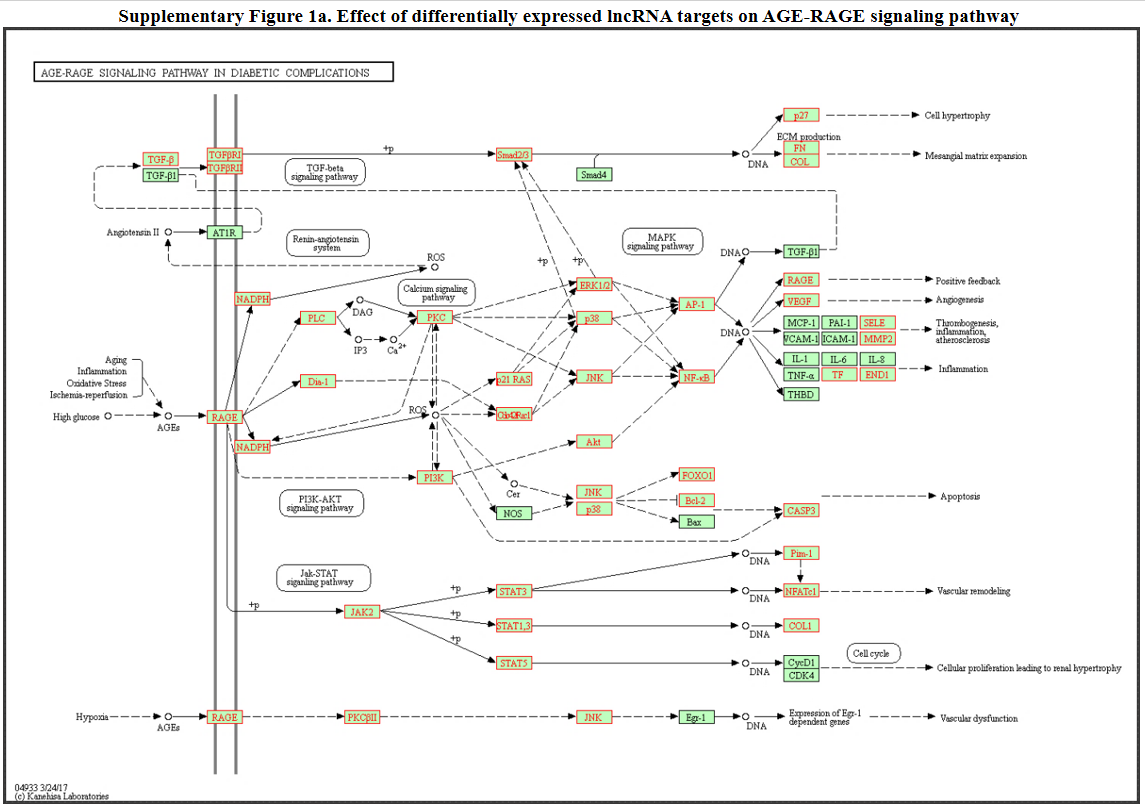


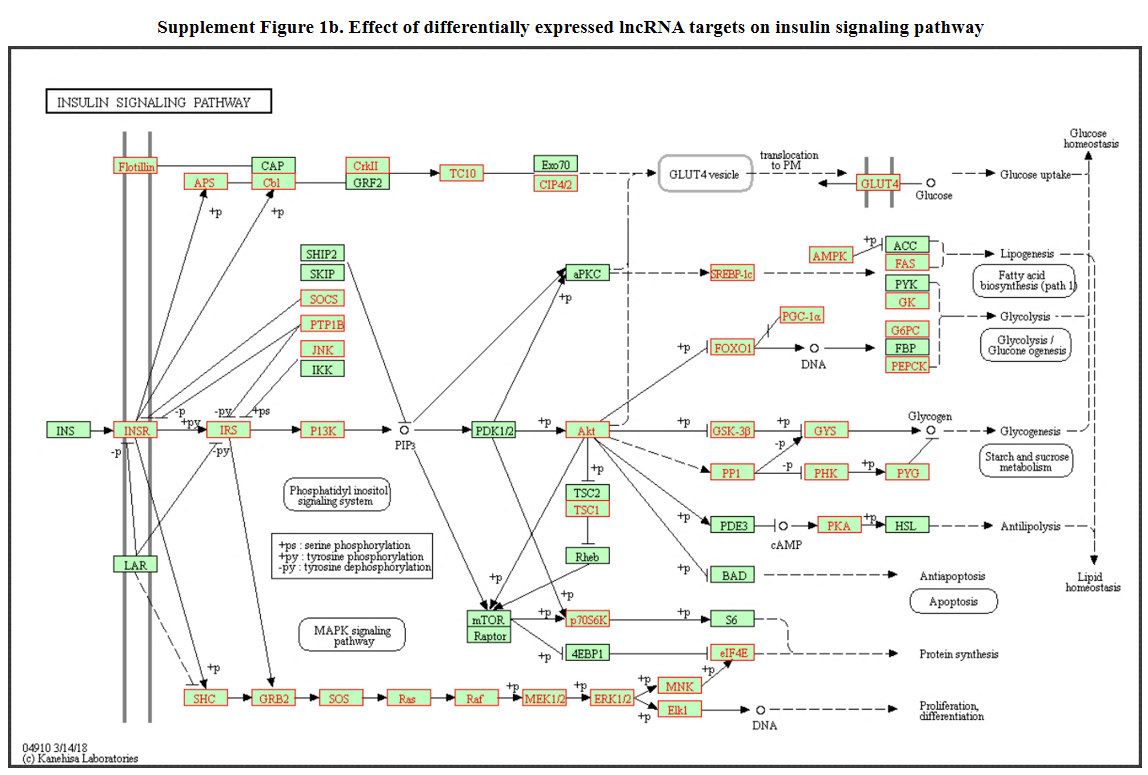


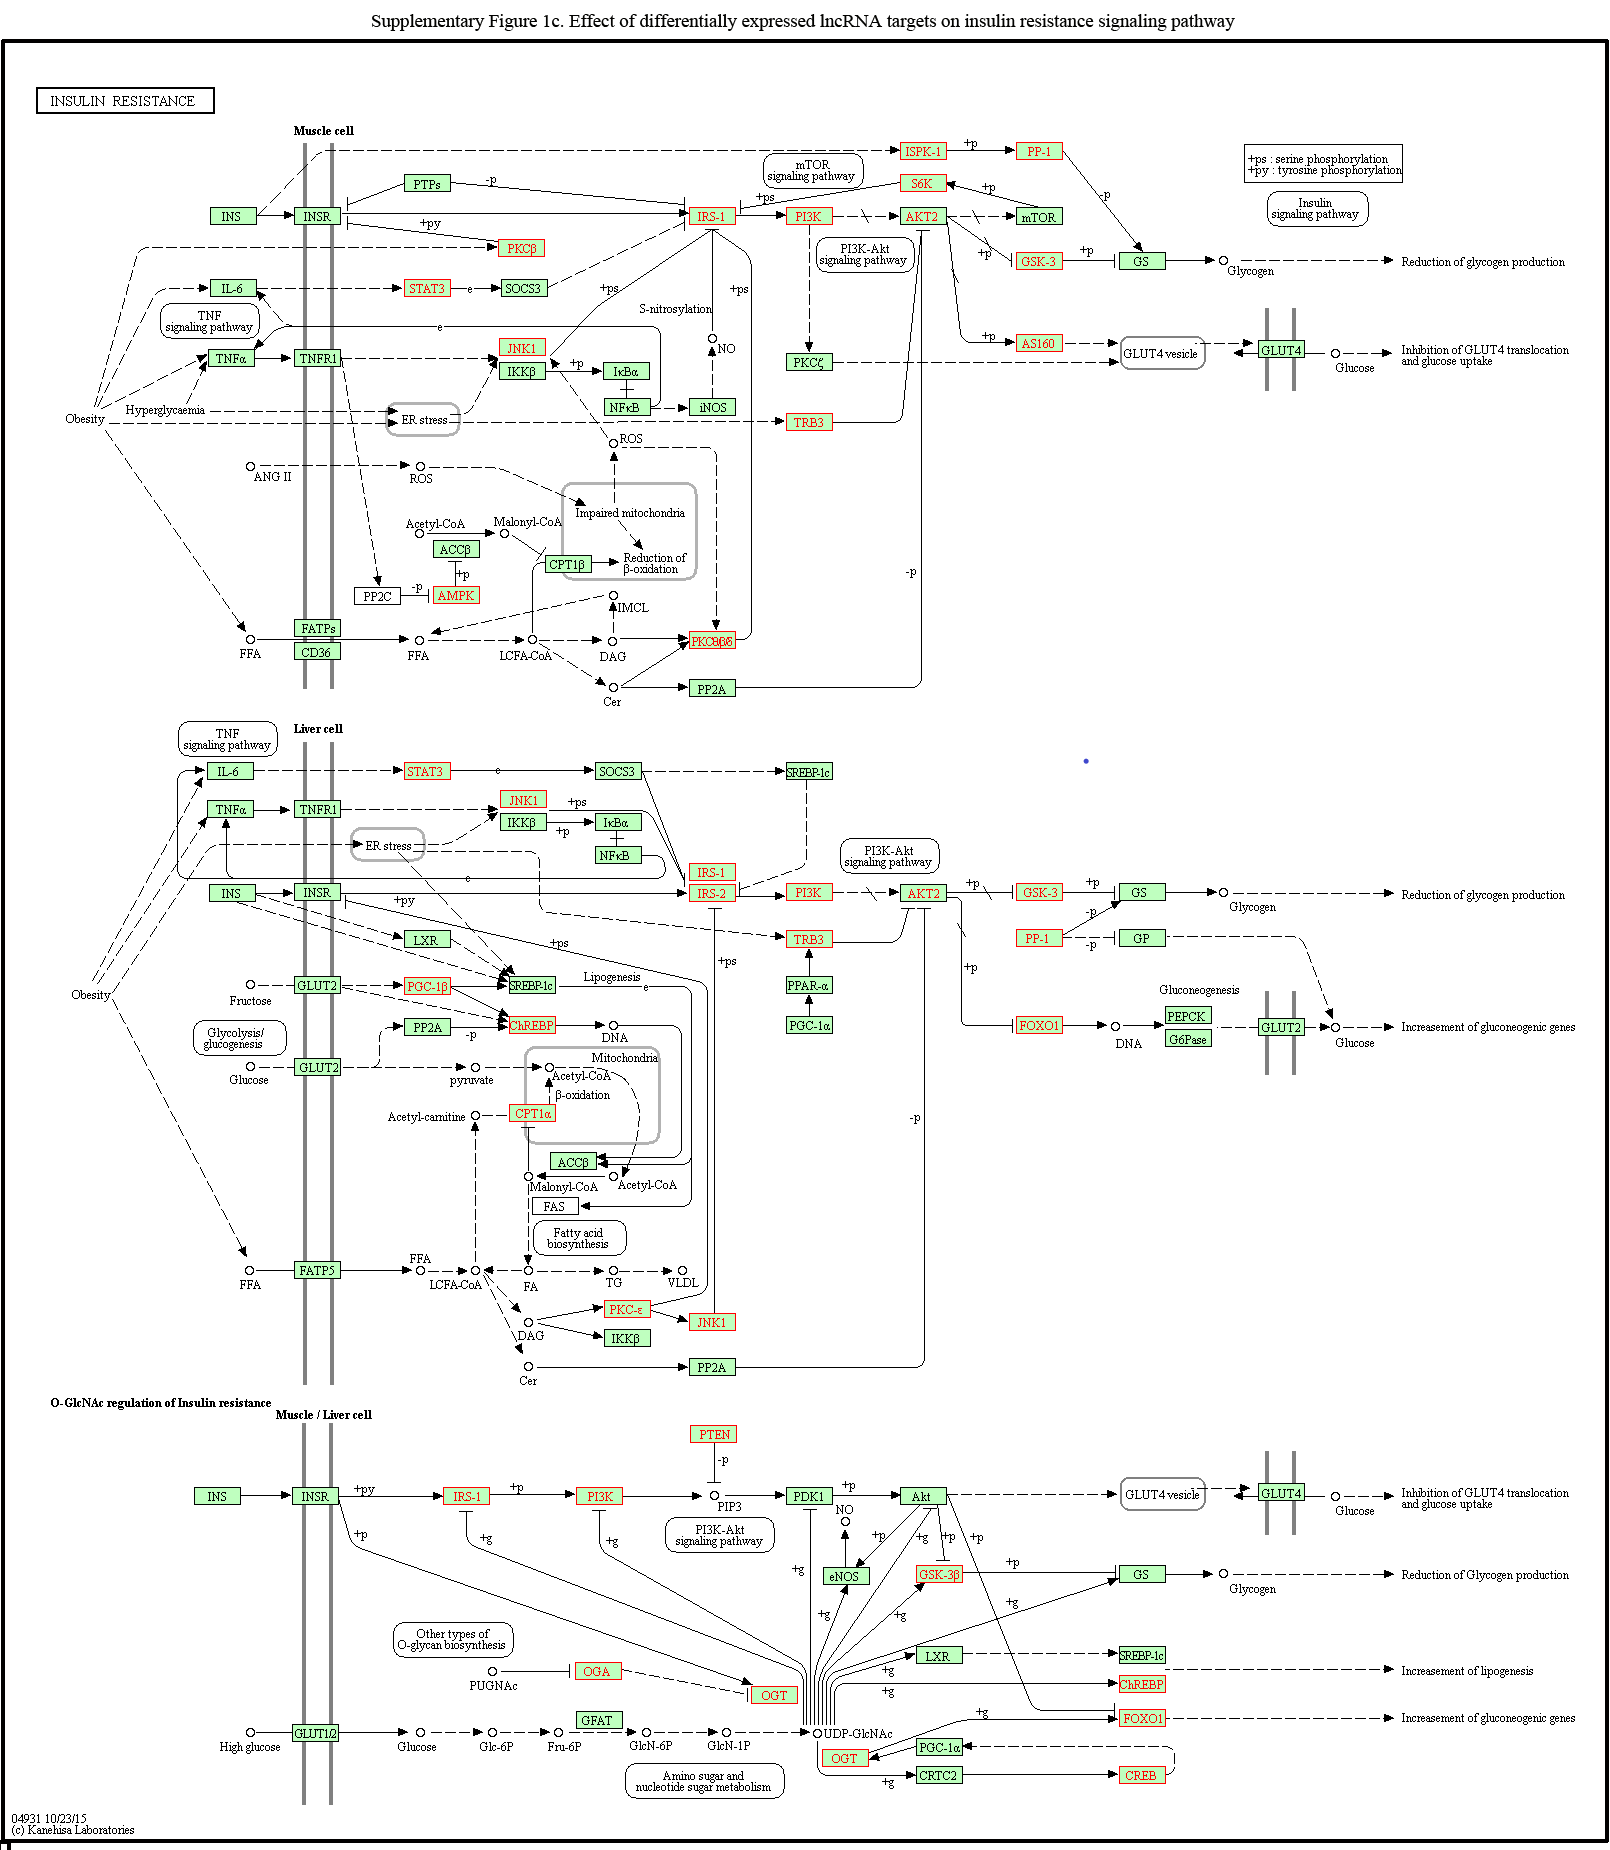

Supplement: f1 [file 3816056.f1.zip › 3816056.f1.docx]

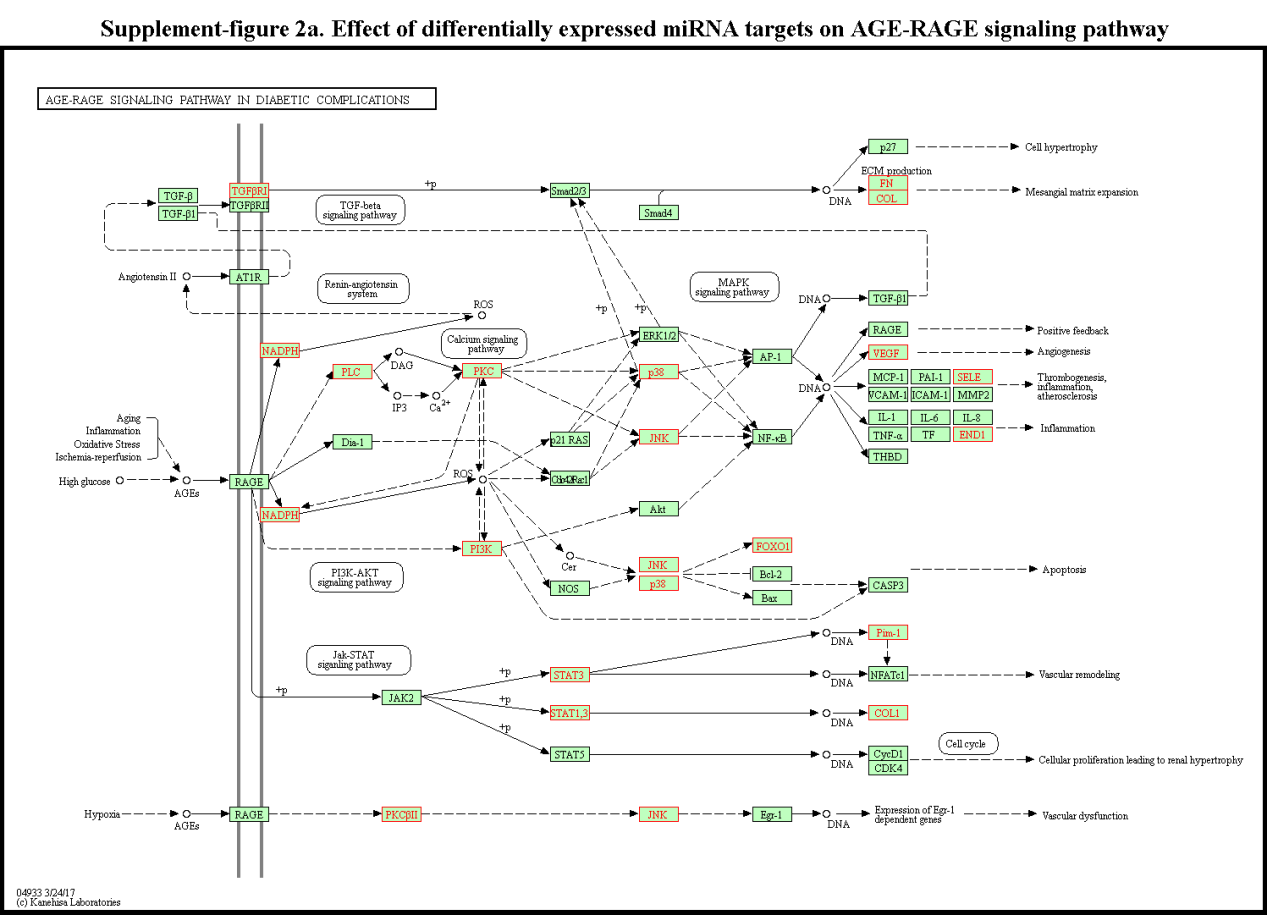


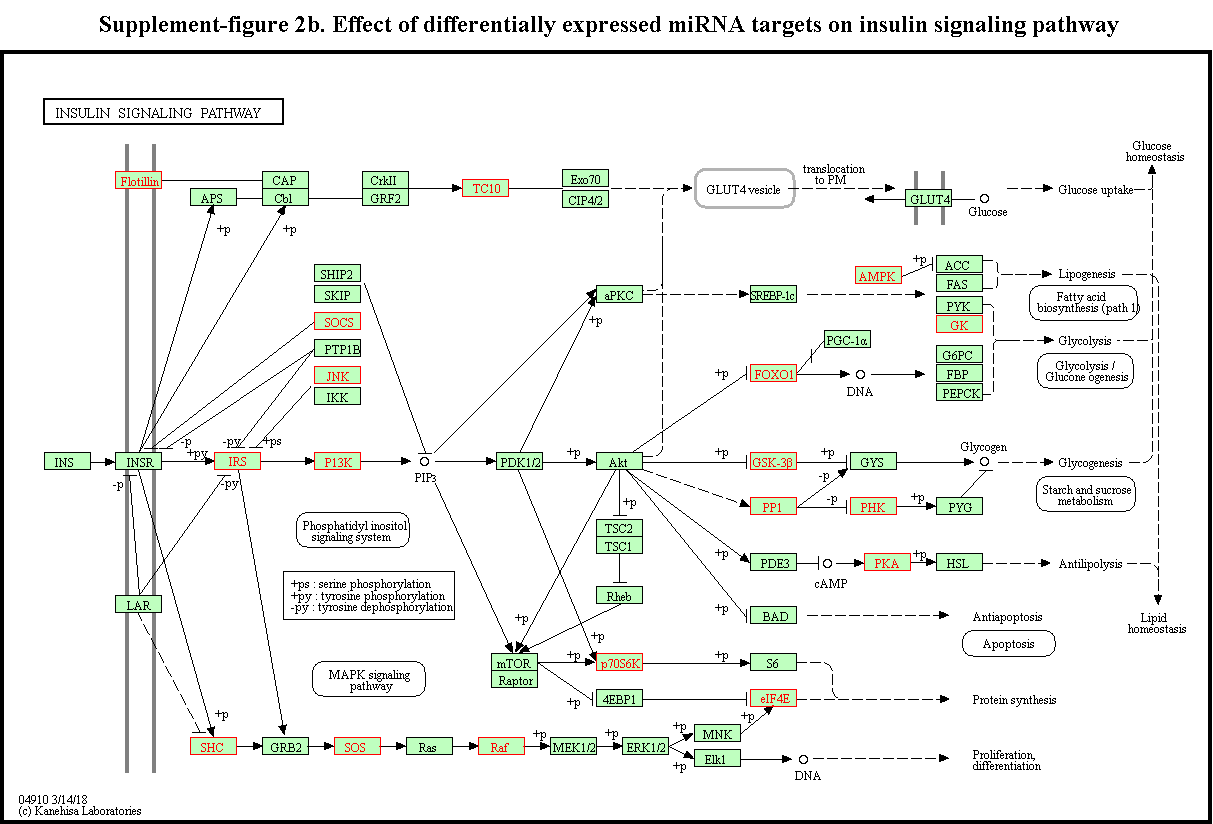

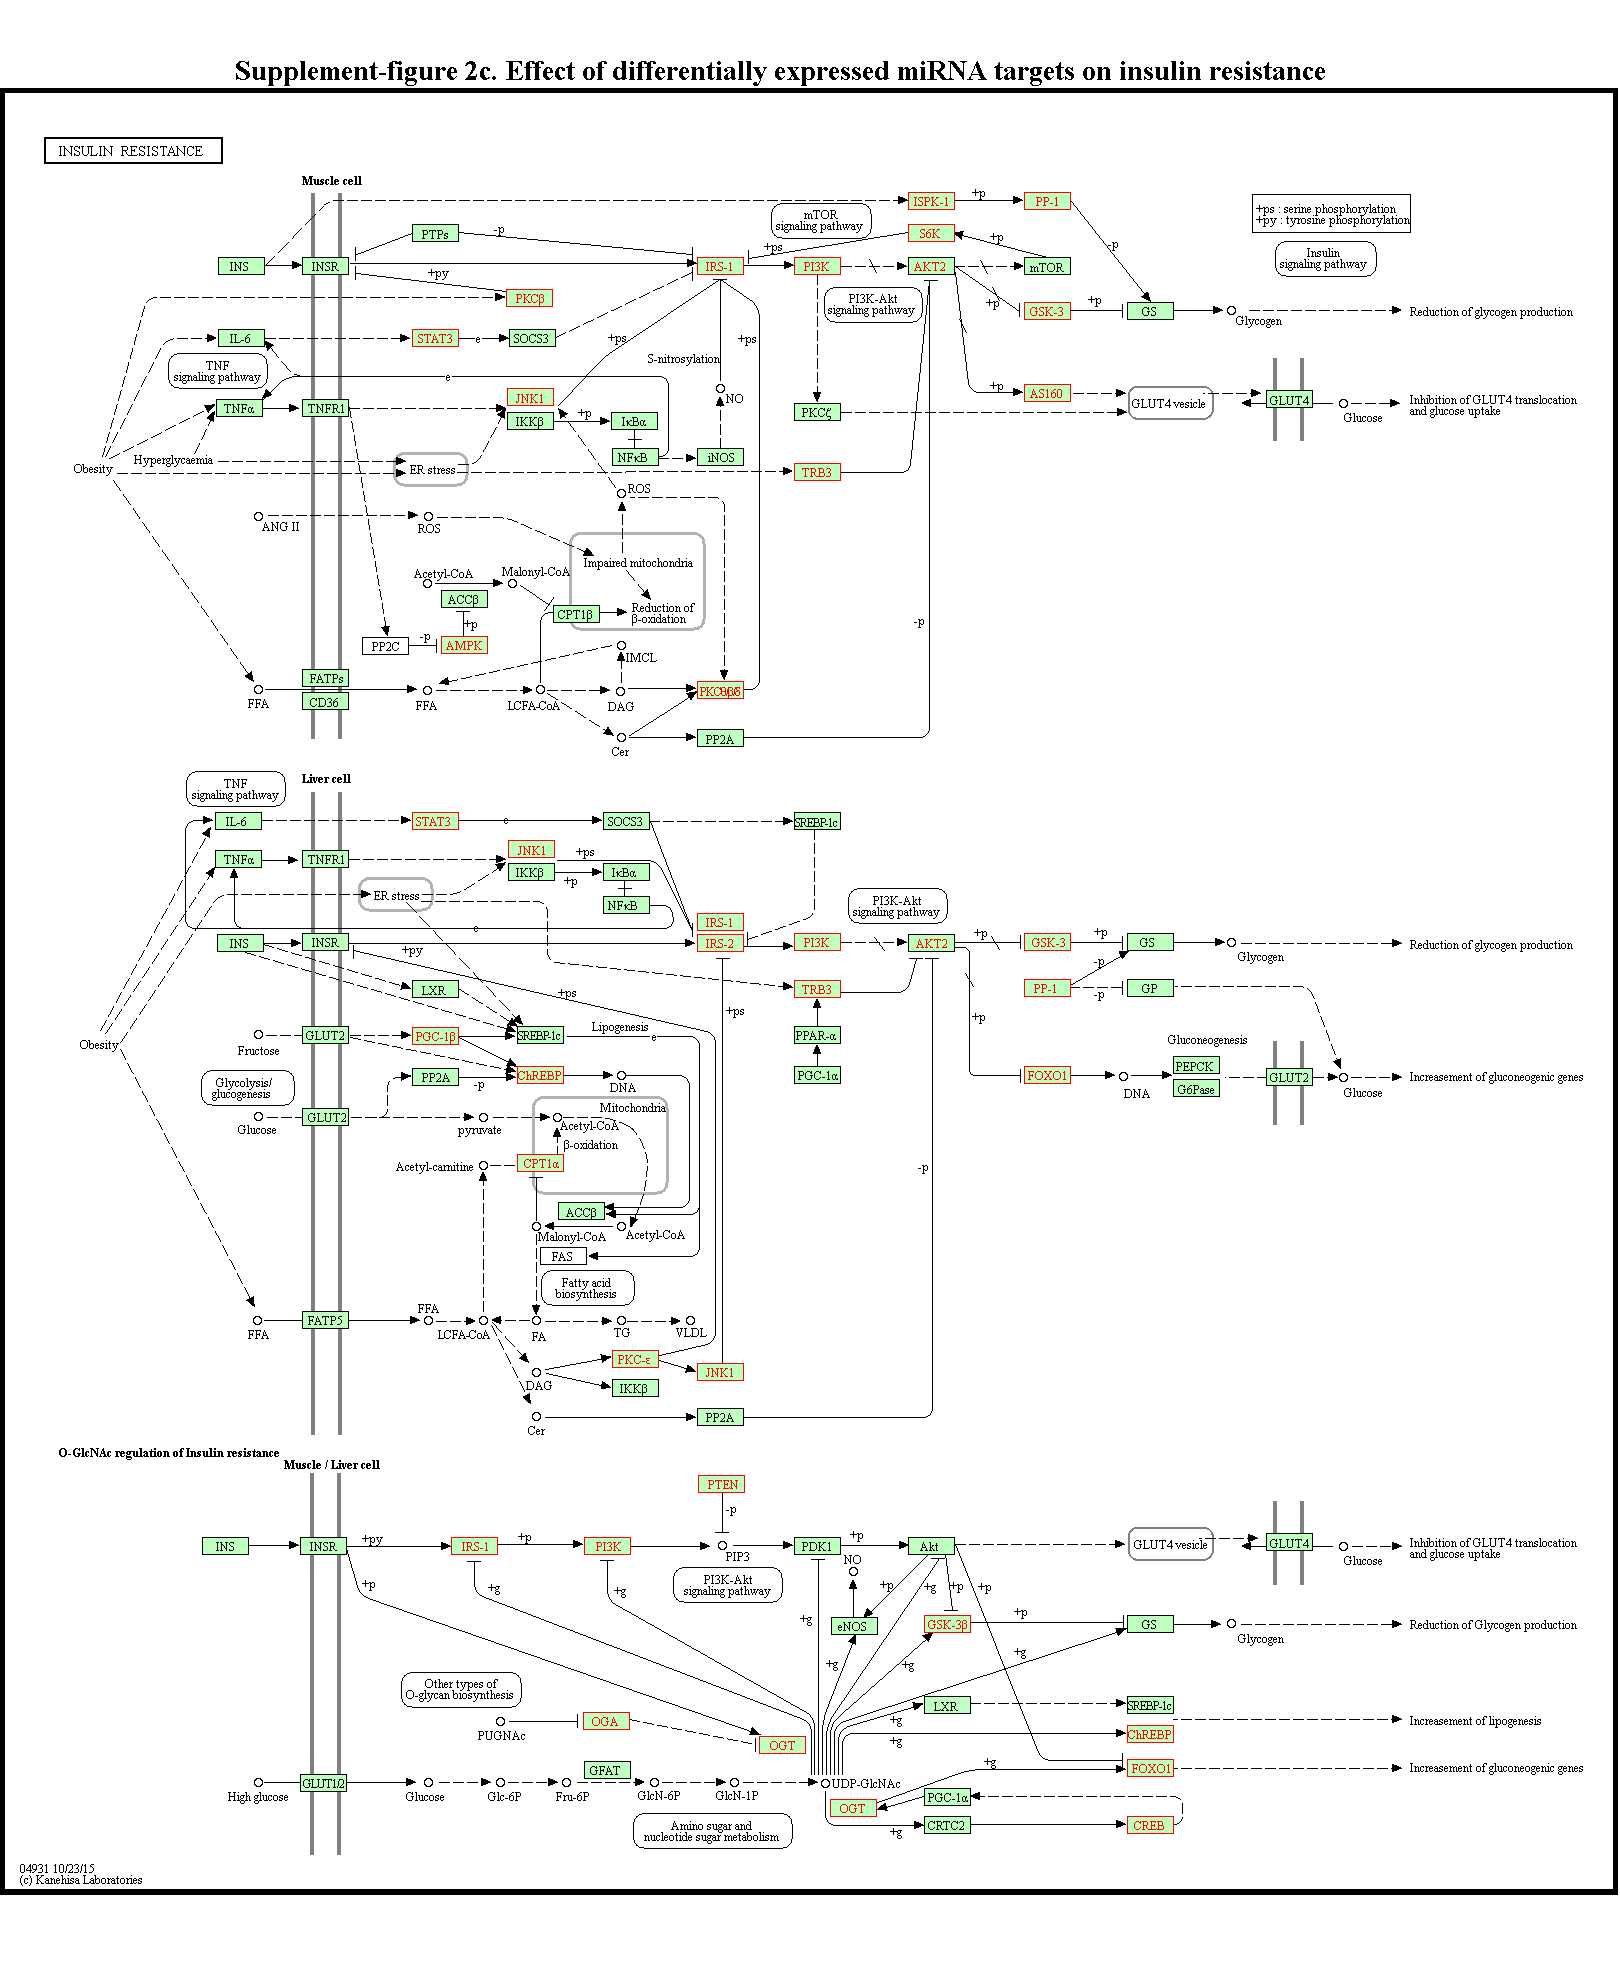

Supplement: f1 [file 3816056.f1.zip › 3816056.f2.docx]

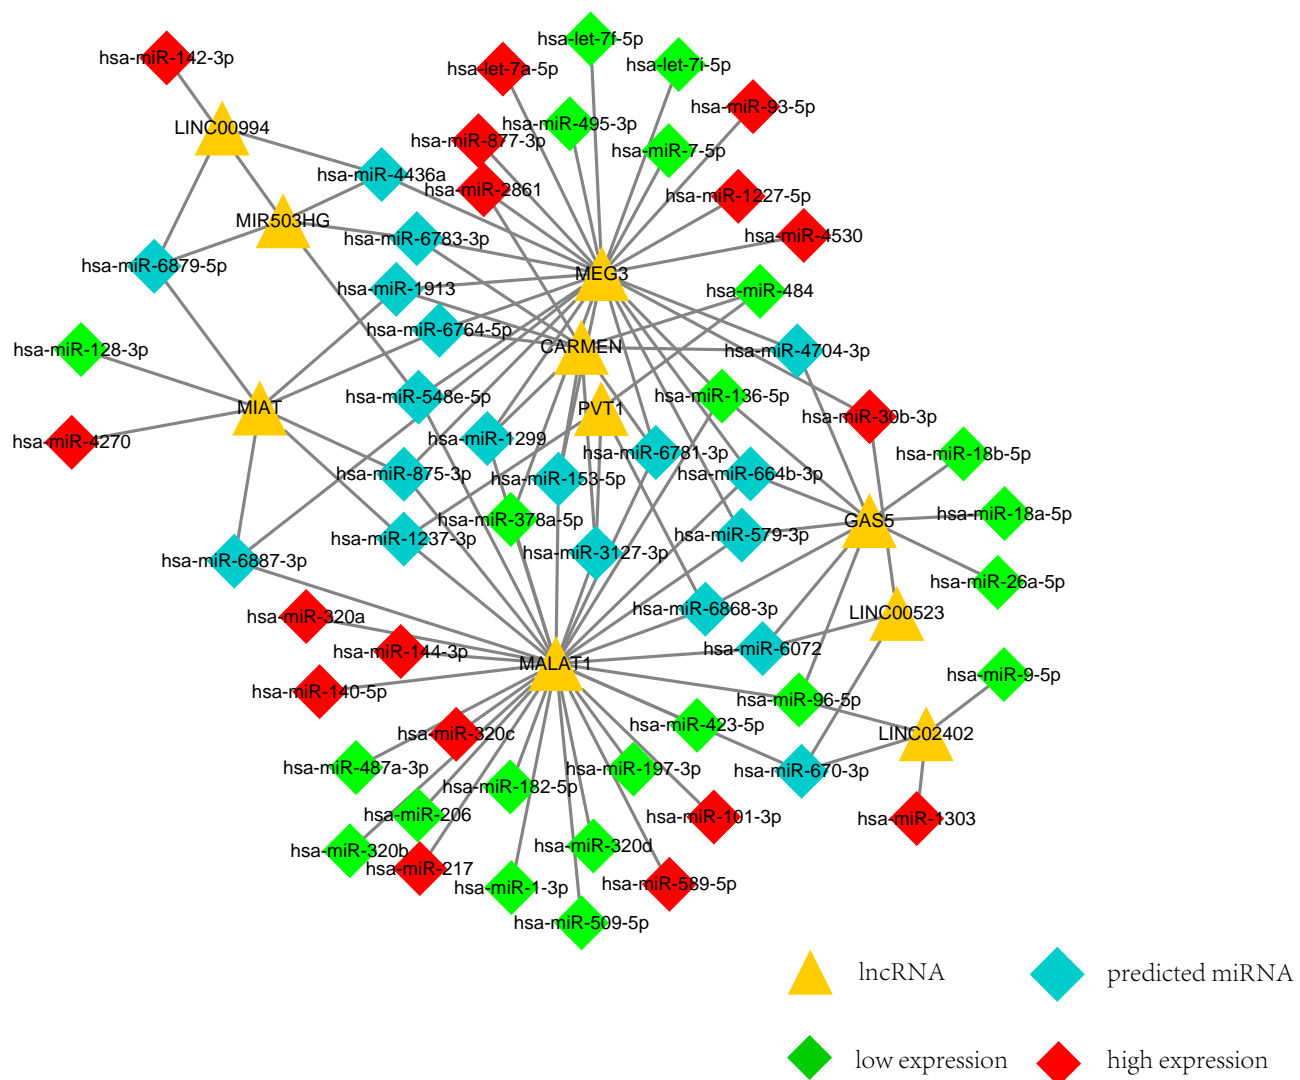

Supplement: f1 [file 3816056.f1.zip › 3816056.f3a.pdf]

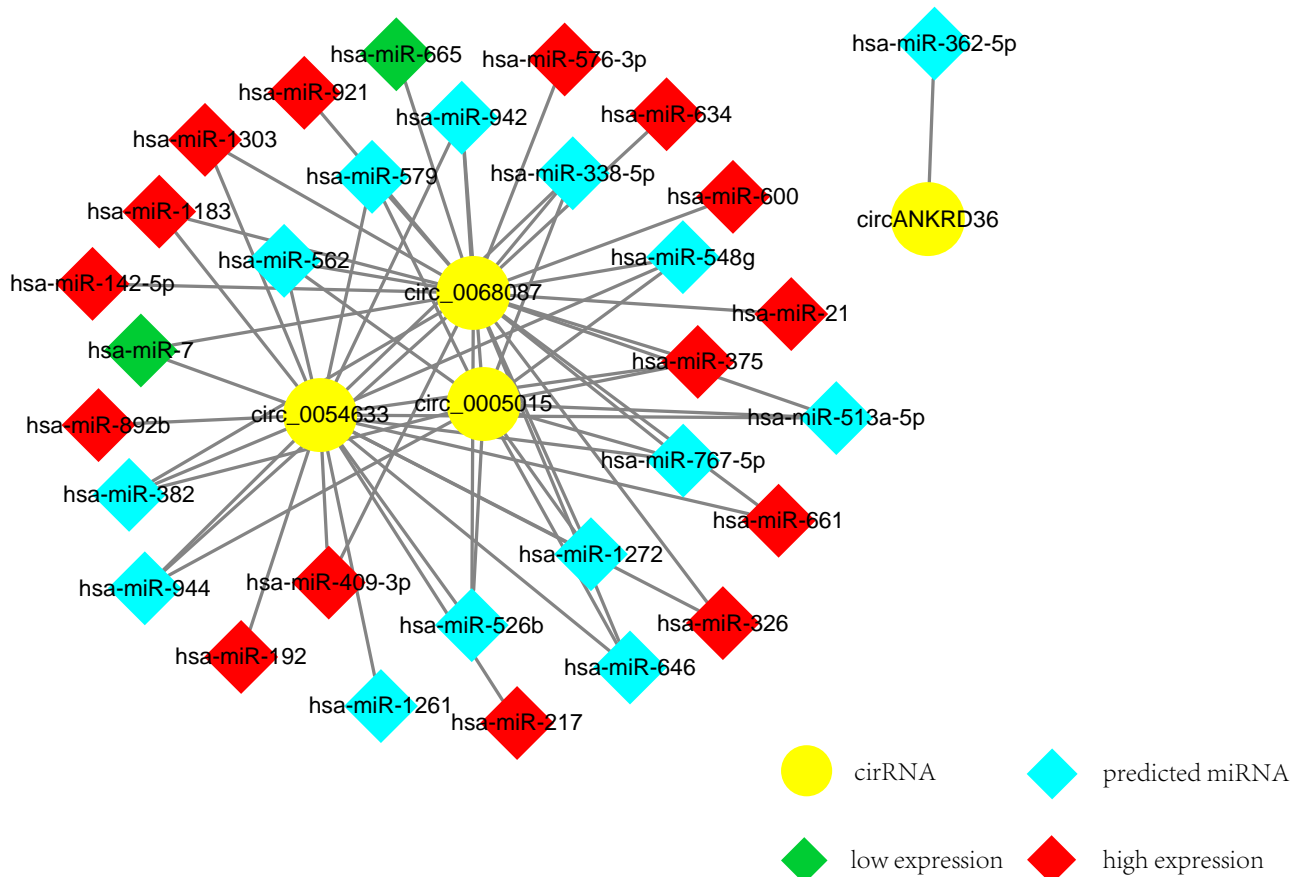

Supplement: f1 [file 3816056.f1.zip › 3816056.f4b.pdf]
